# Supplementary material for: Hyaluronic acid hydrogel scaffolds loaded with cationic niosomes for efficient non-viral gene delivery
Source: Royal Society of Chemistry journal article supplement (doi:10.1039/c8ra05125a), 2018-01-01
Supplement: c8ra05125a1.pdf [file c8ra05125a1.pdf]

SUPPLEMENTARY MATERIAL

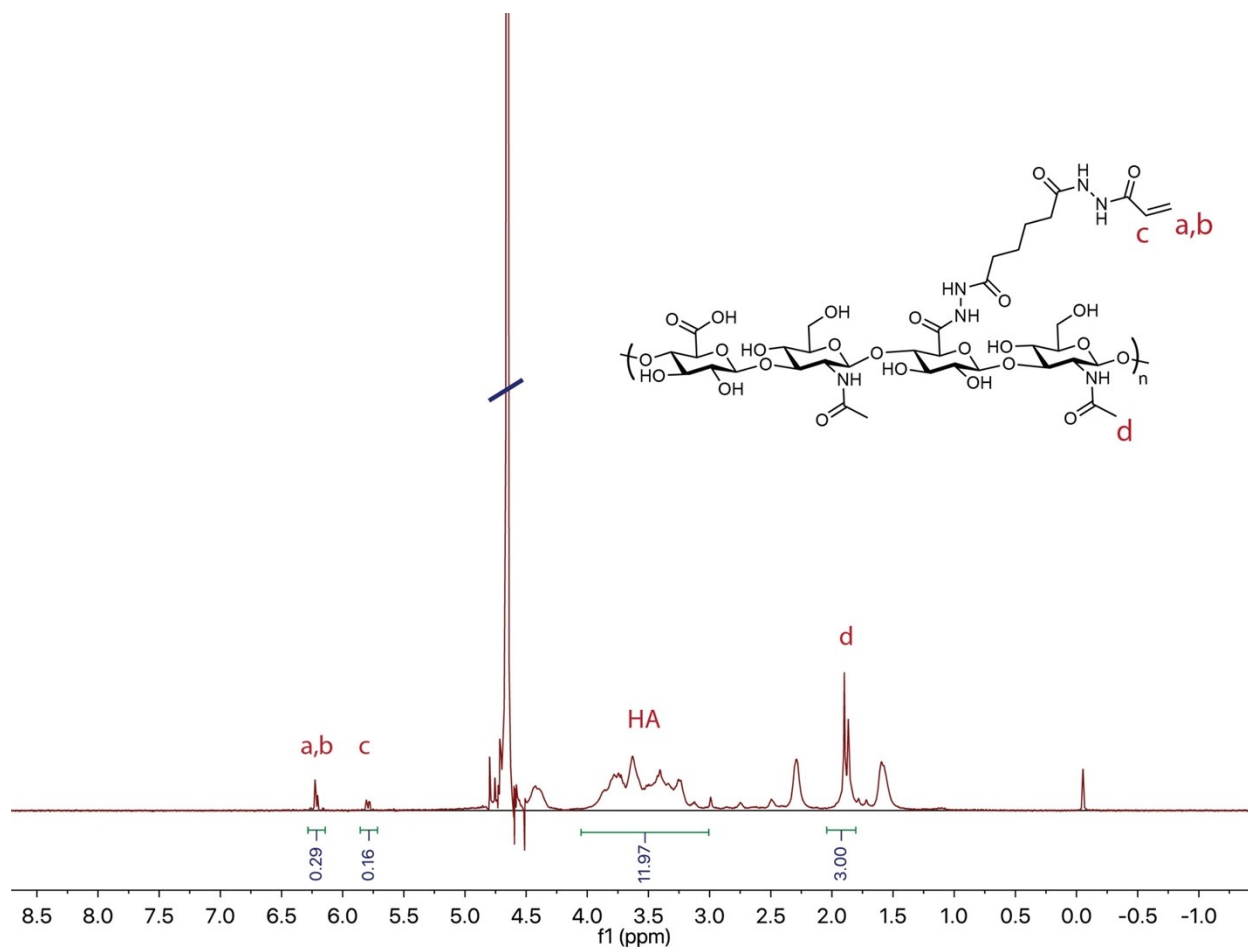

**Supplementary Figure 1.** The extent of acrylation was determined to be 15% using <sup>1</sup>H-NMR (D<sub>2</sub>O) by taking the ratio of the sum of the peaks corresponding to the acrylate hydrogens at  $\delta = 5.8$  and  $6.2$  ppm to the peak corresponding to the acetyl methyl hydrogens in HA at  $\delta = 1.9$  ppm.
